# Supplementary material for: Upregulation of CIRP by its agonist prevents the development of heart failure in myocardial infarction rats
Source: Springer Nature journal article supplement (doi:10.1186/s12872-024-03852-9), 2024-03-27

Supplemental Figure S1

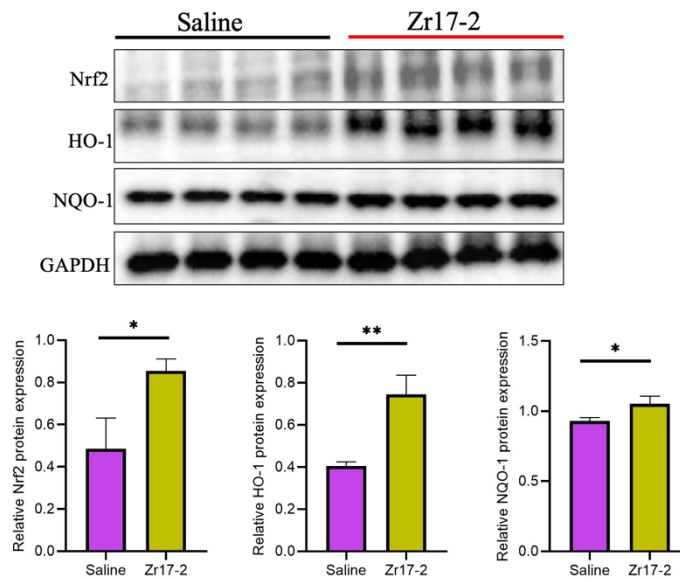

**Supplemental Figure S1:** Effects of zr17-2 on the expression of Nrf2, HO-1 and NQO-1 in normal SD rats. The SD rats was treated with zr17-2 (20nmol/kg, i.p.) or saline once every other day 3 times, followed by the evaluation of cardiac genes expression by western blot. \*p<0.05, \*\*p<0.001.

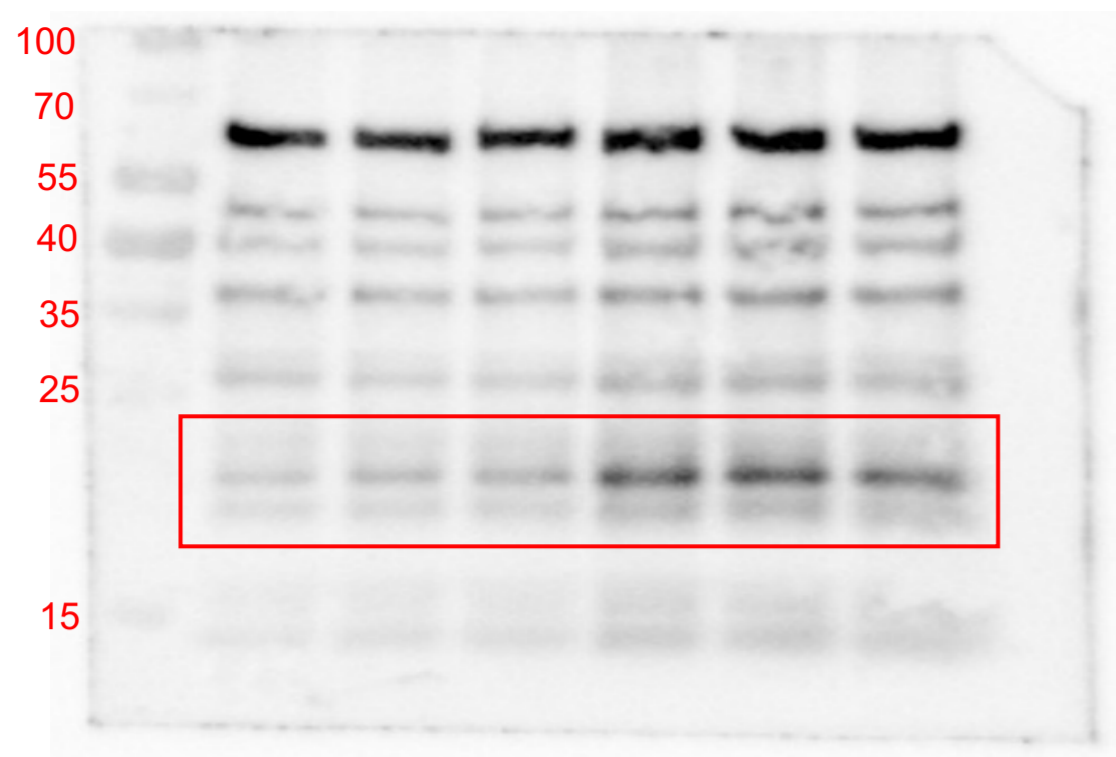

CIRP

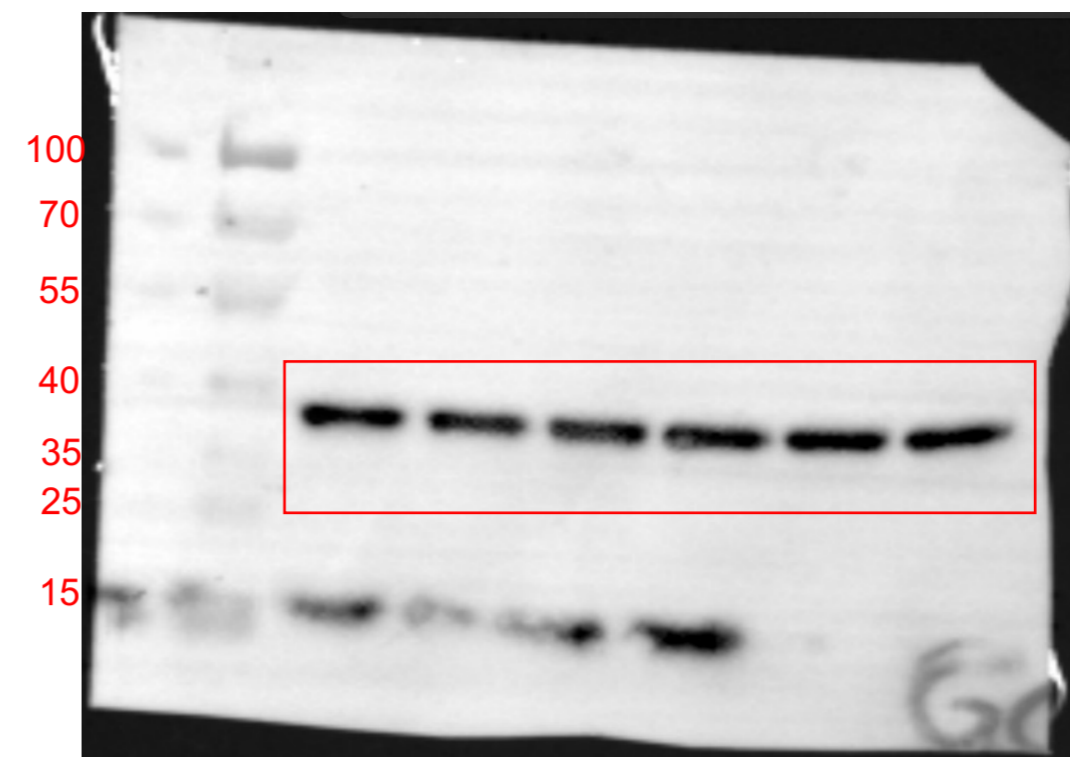

GAPDH

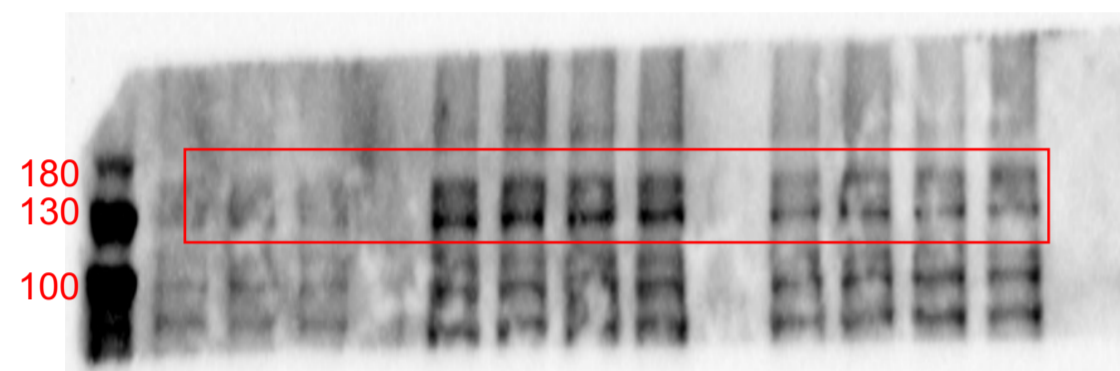

Collagen I

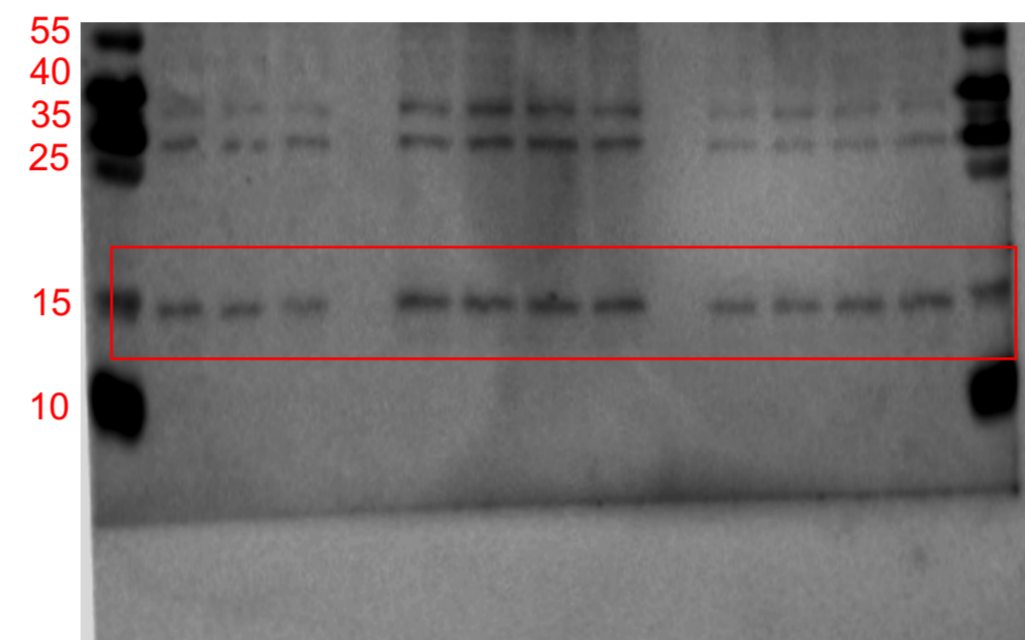

IL-1β

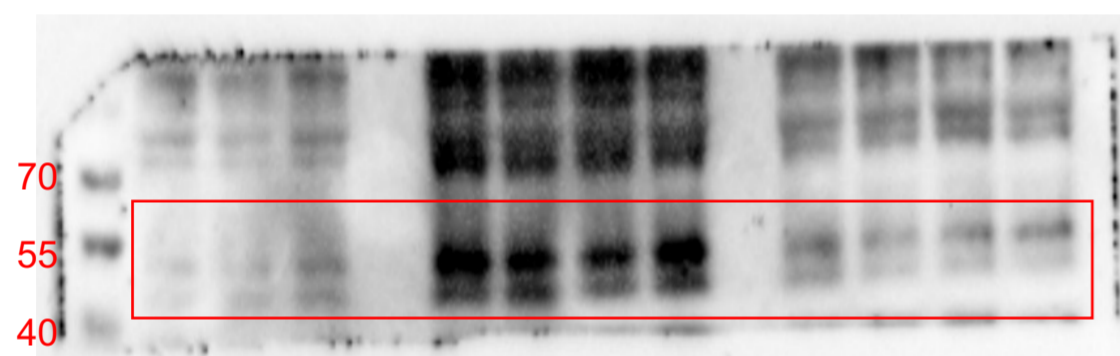

TGF-β

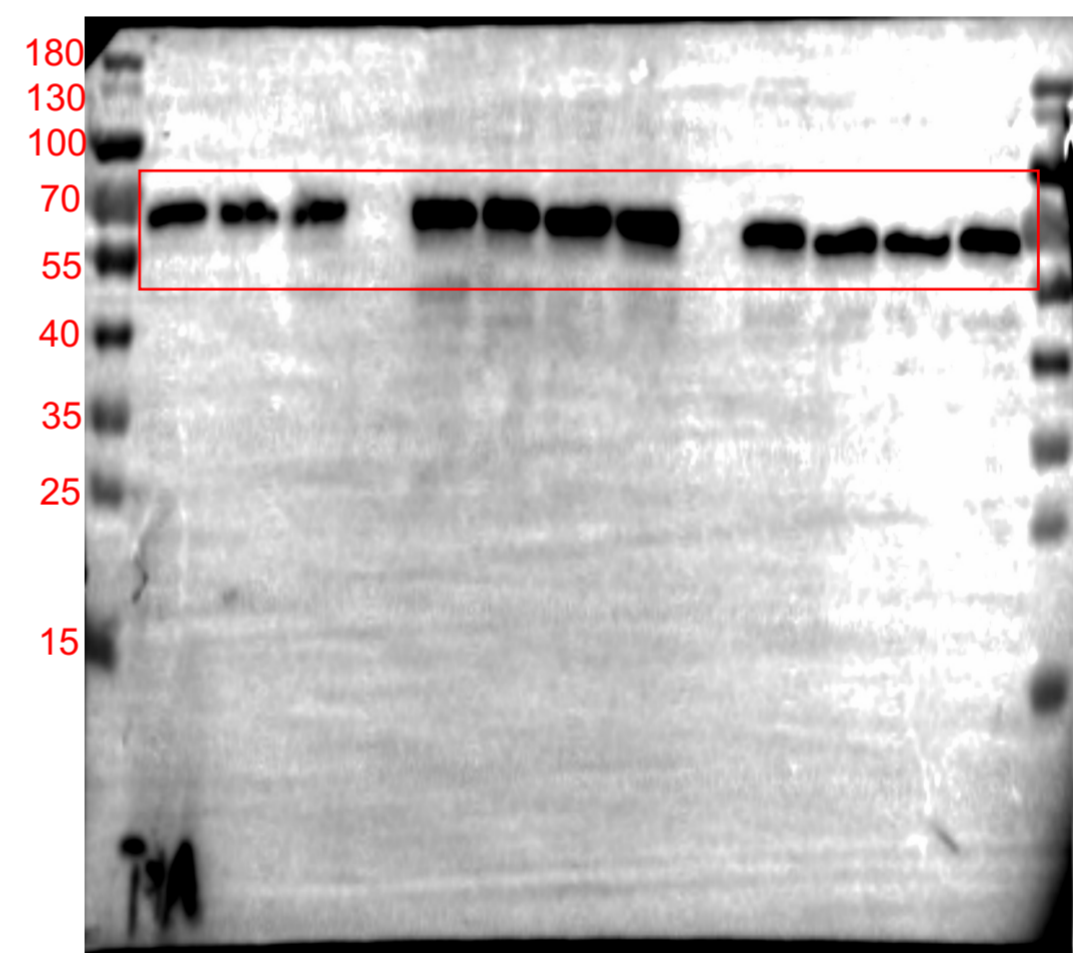

ICAM-1

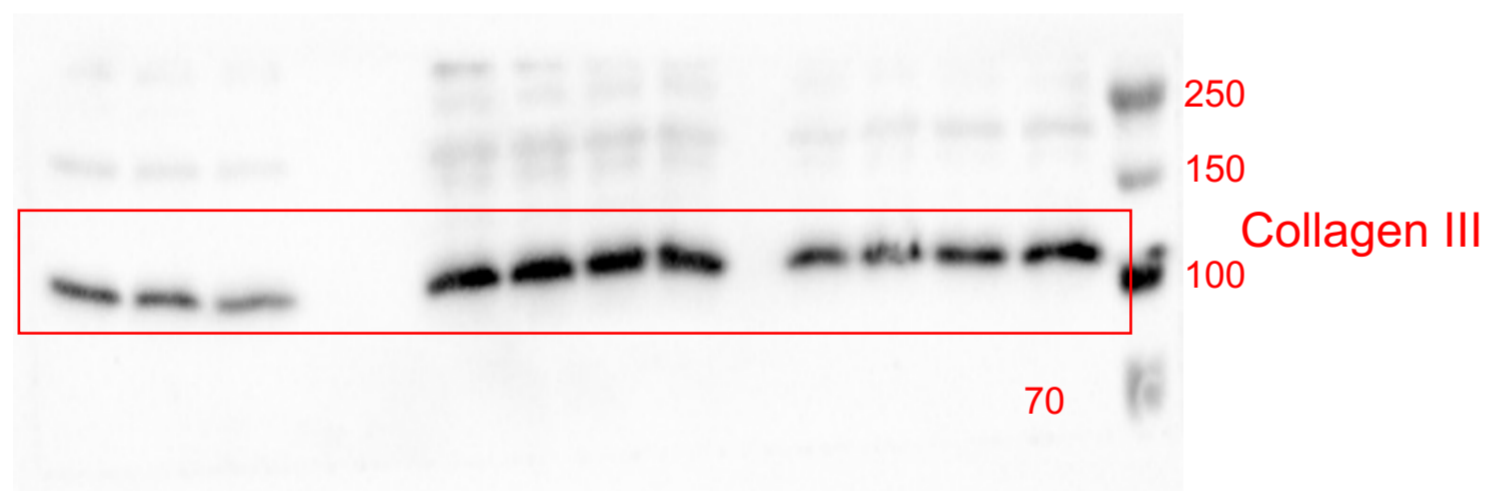

Collagen III

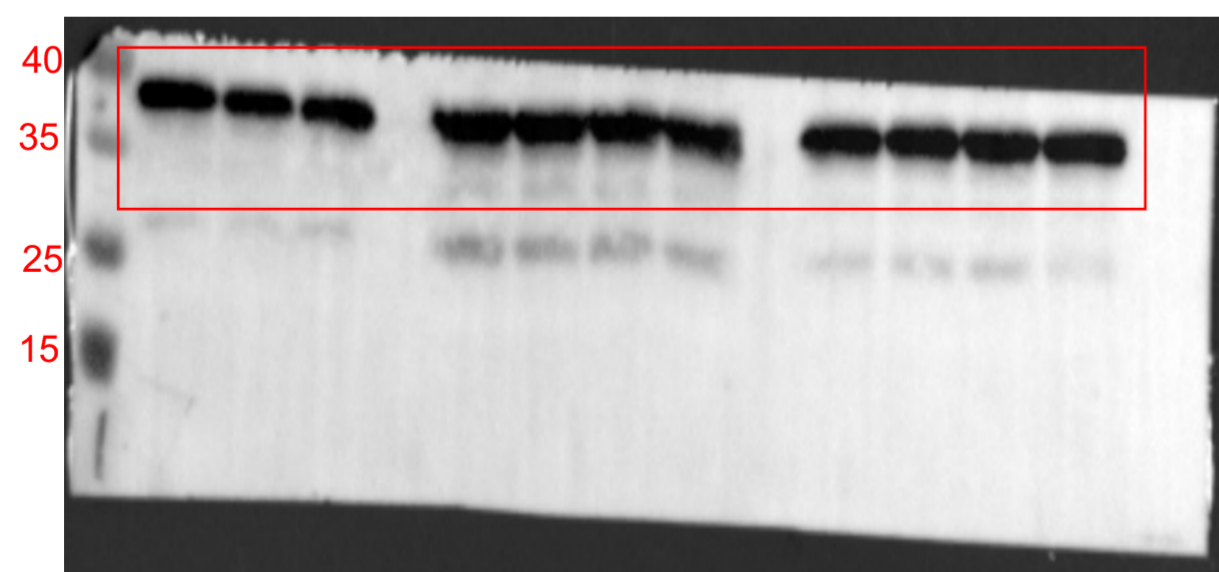

GAPDH

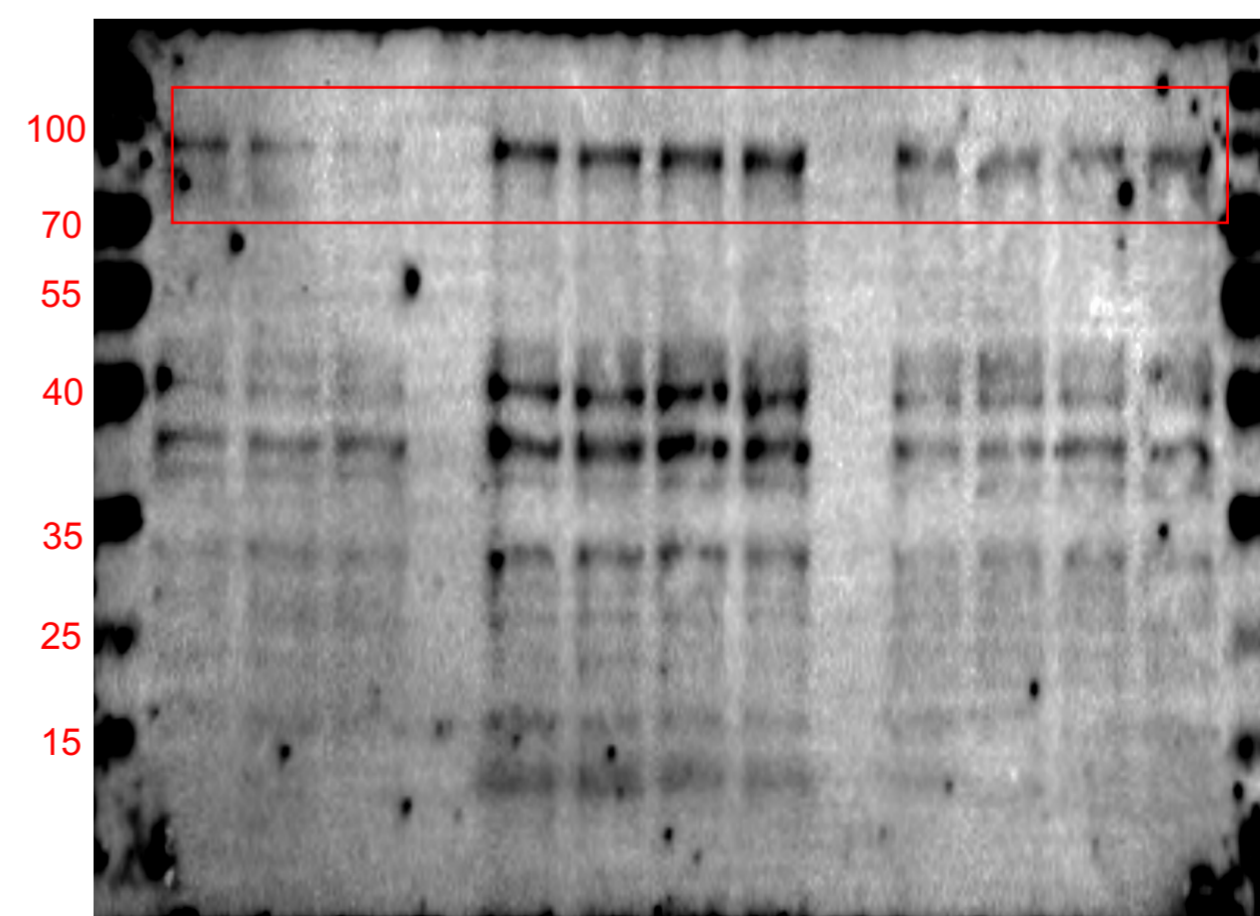

VCAM-1



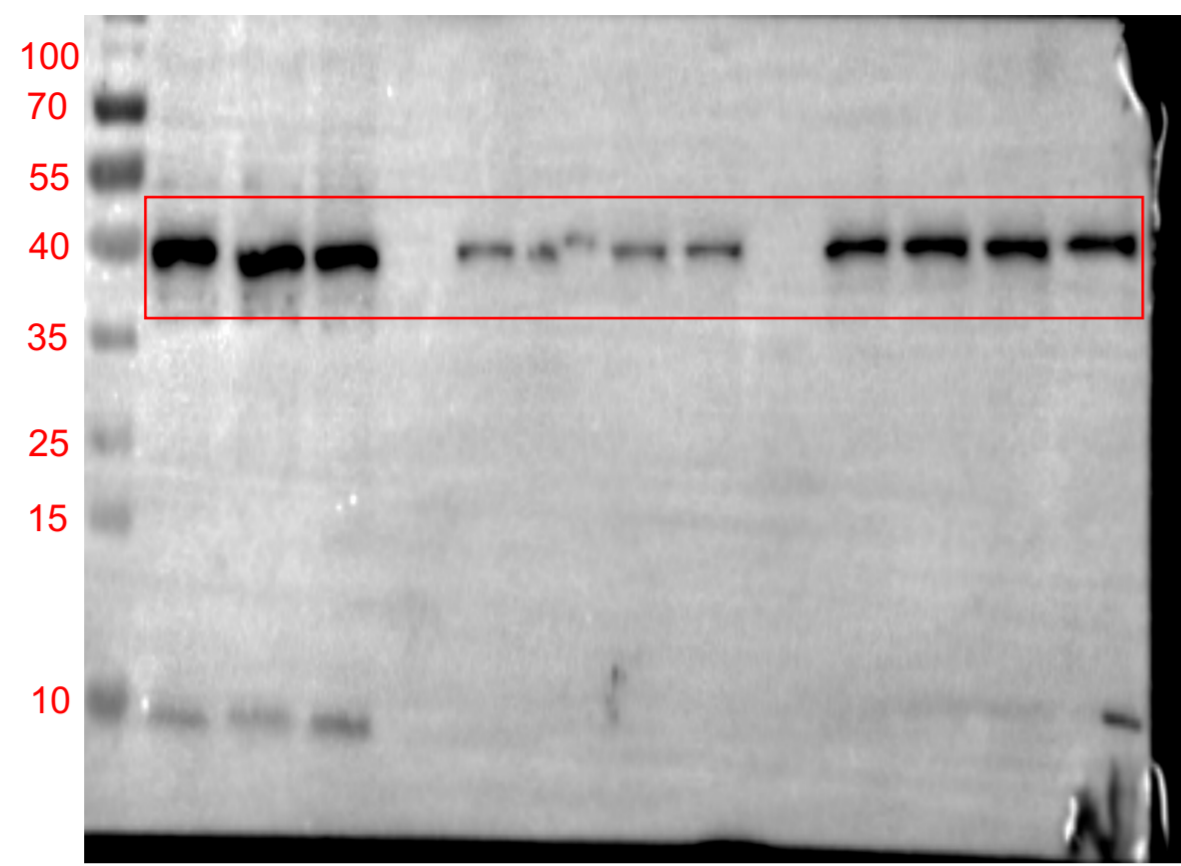

Nrf2

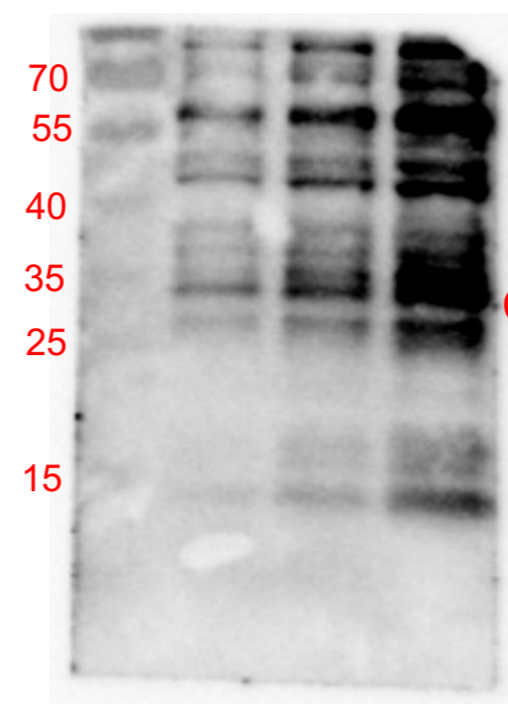

CIRP

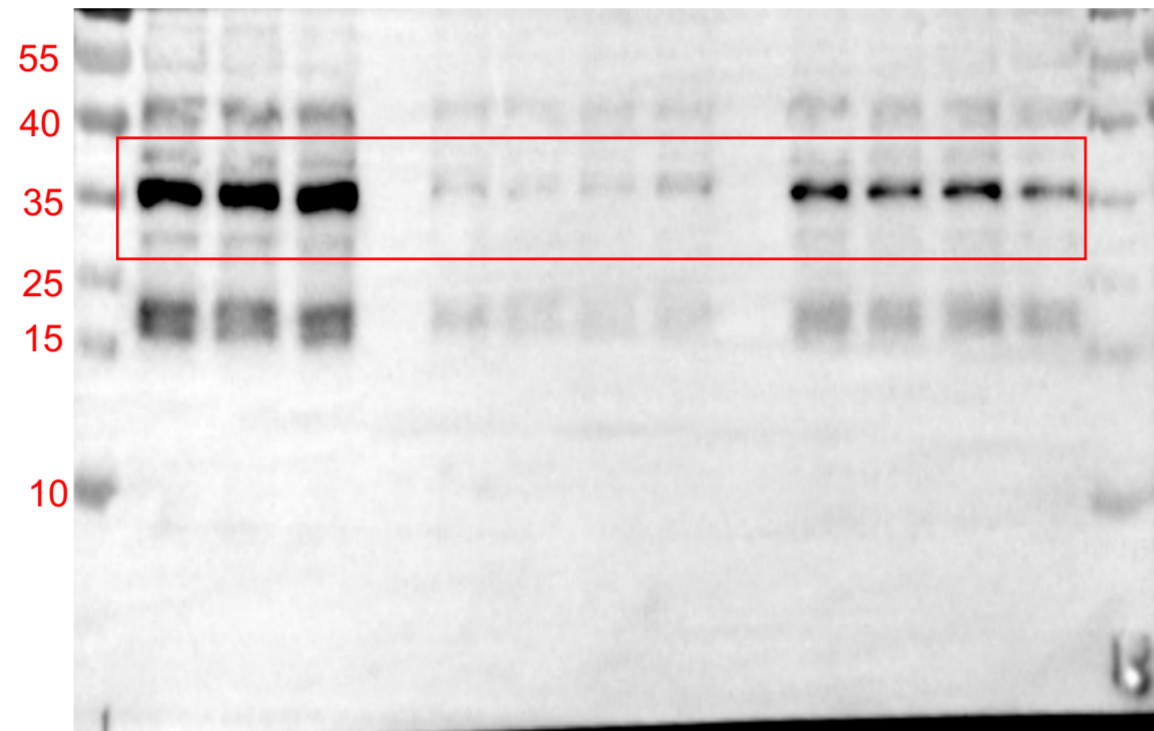

HO-1

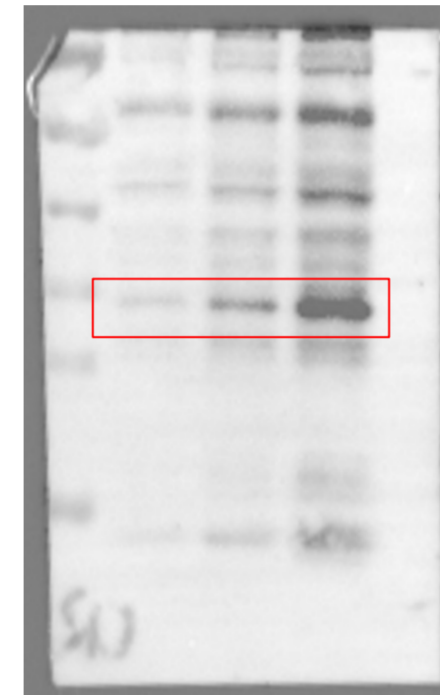

HO-1

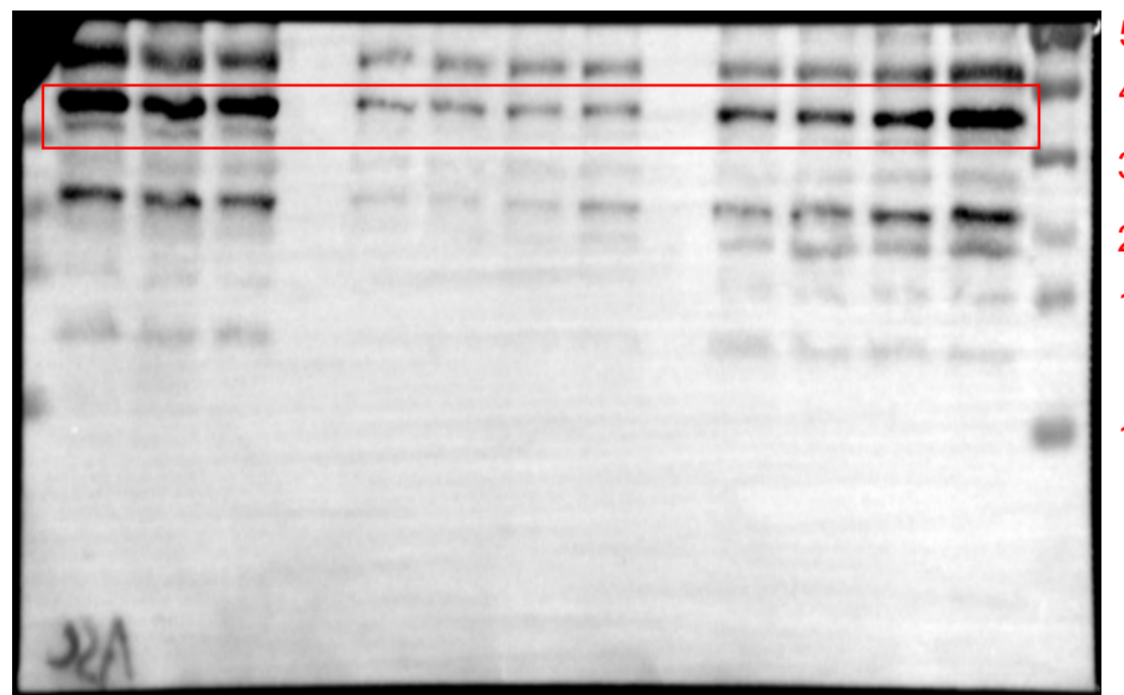

NQO-1

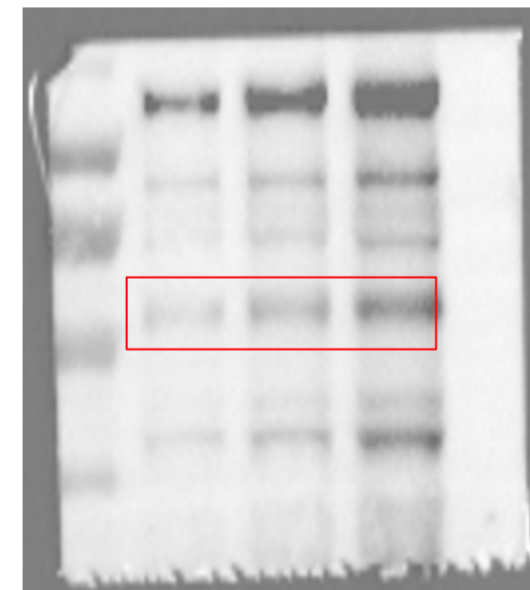

NRF2

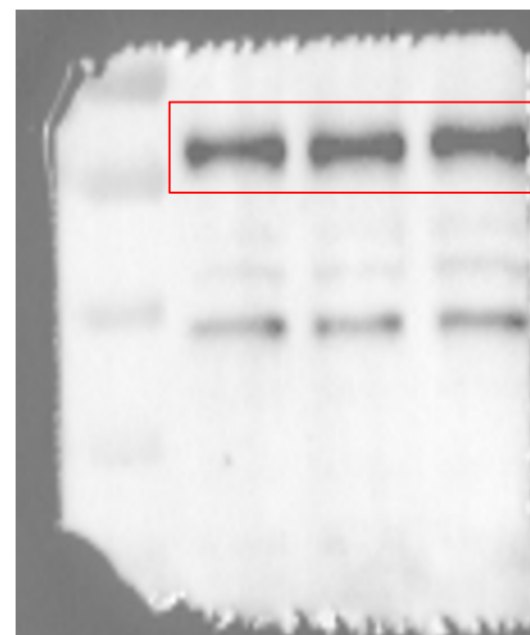

NQO-1

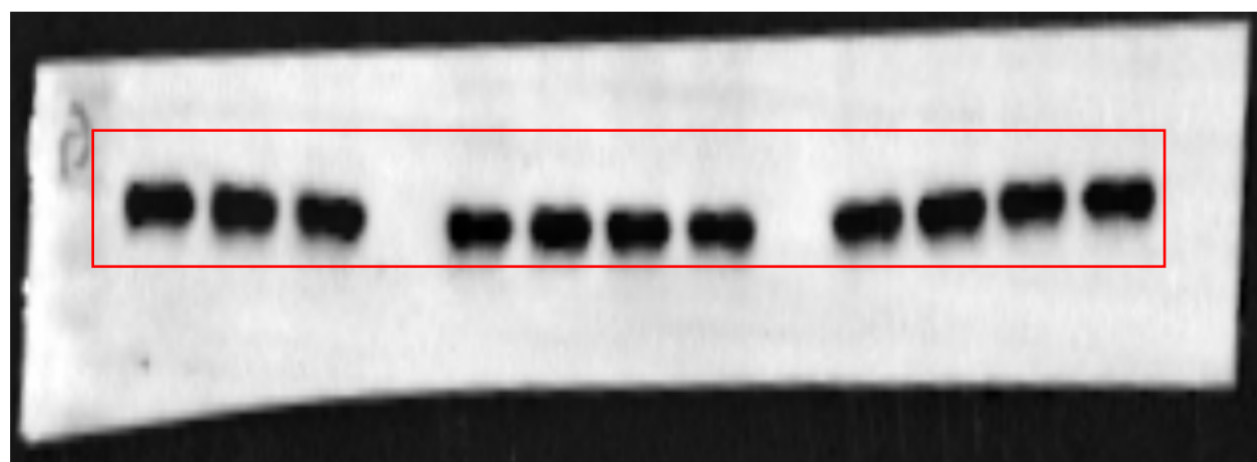

GAPDH

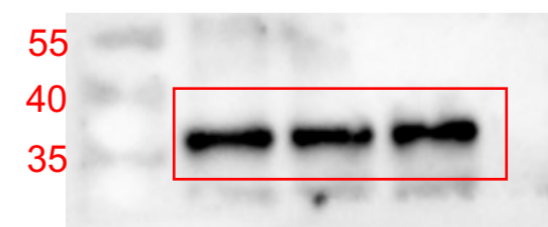

GAPDH

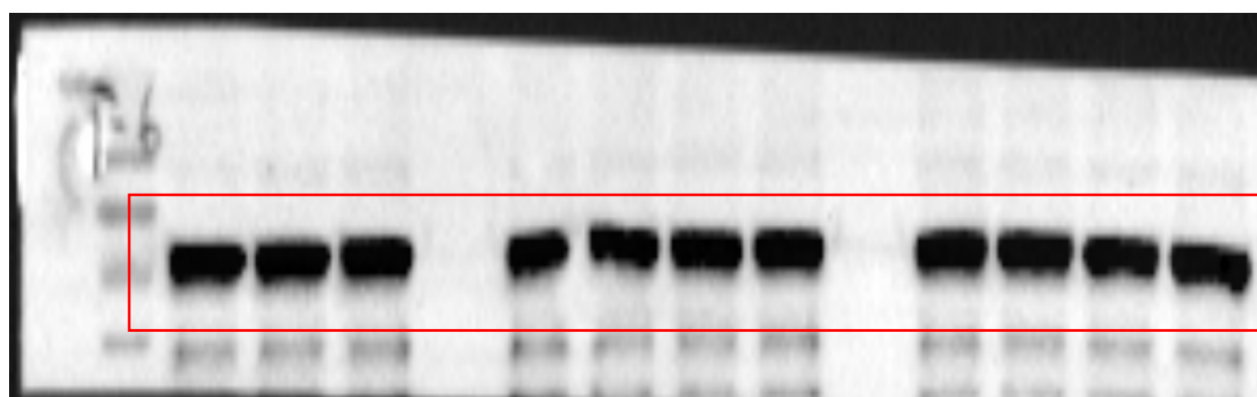

GAPDH

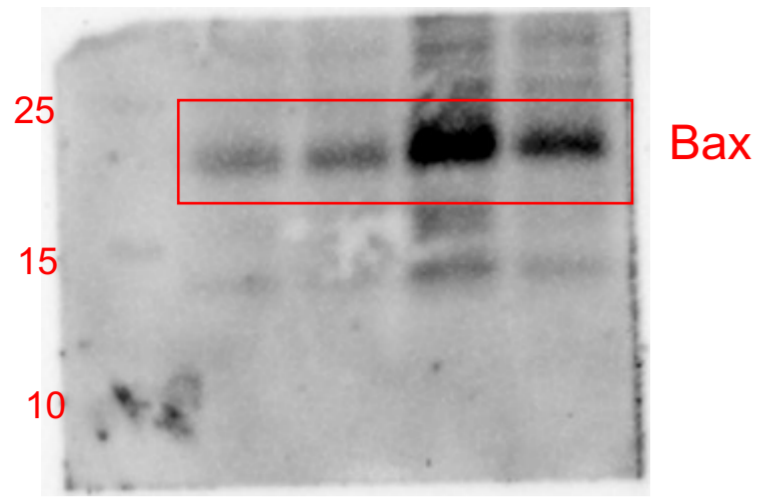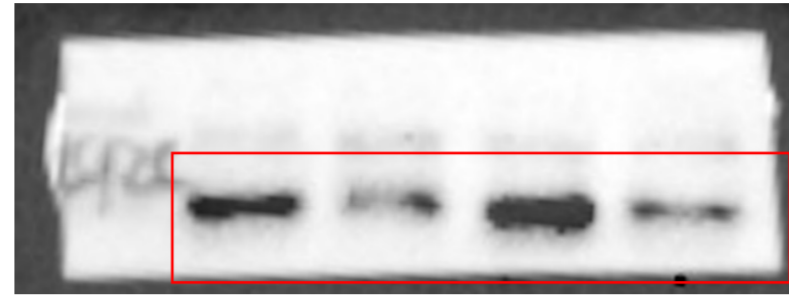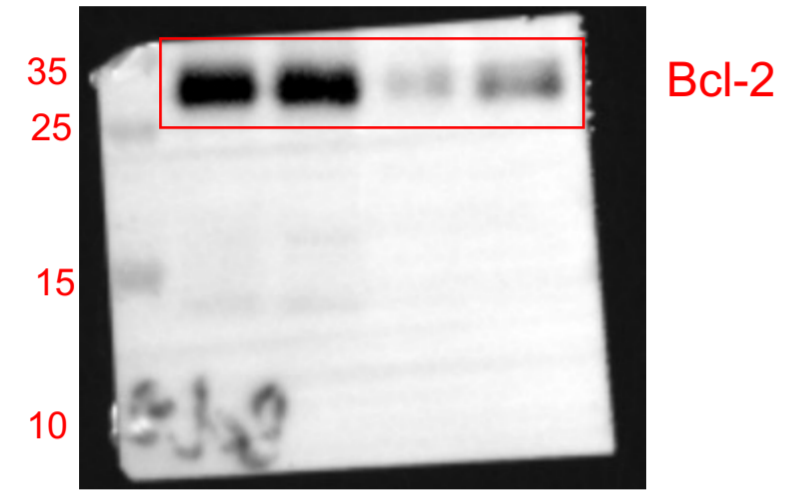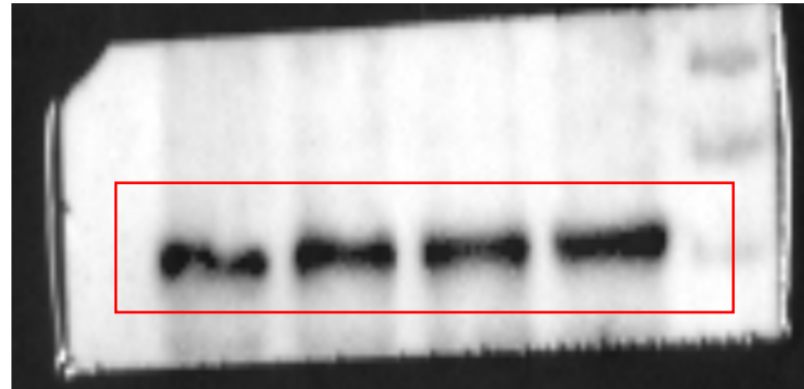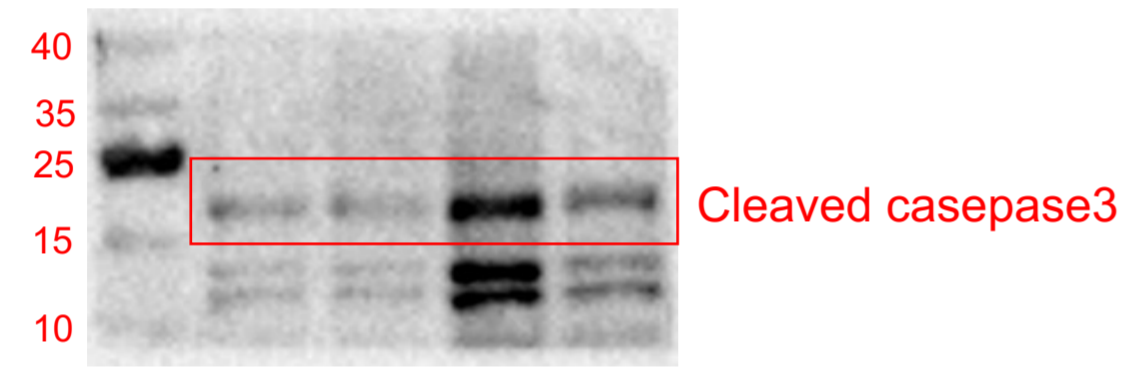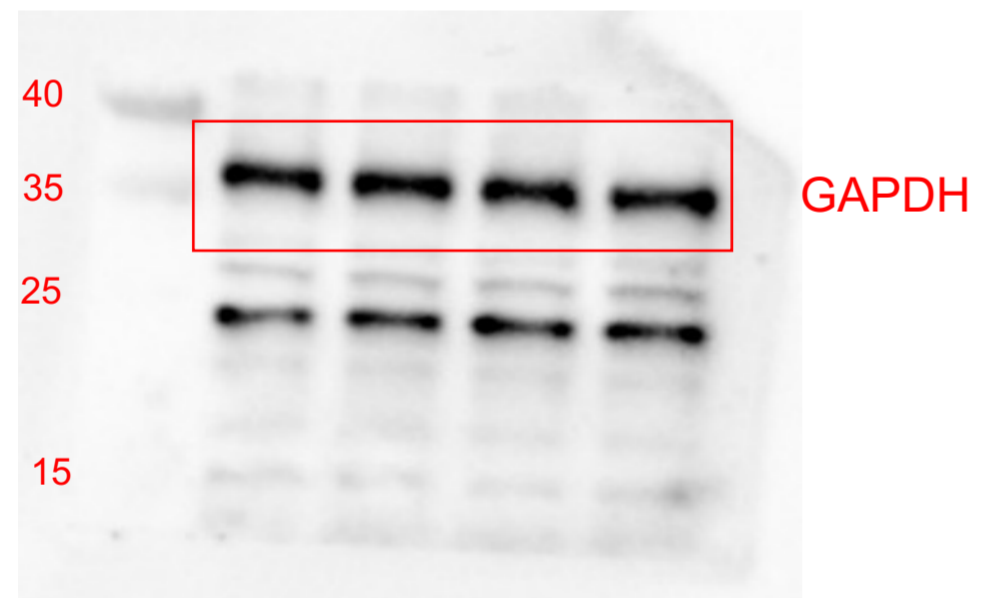

Supplement: MOESM1 [file 26898120]
